# Supplementary material
Source: PubMed Central journal article supplement (PMC1199540)

# GO-Standard

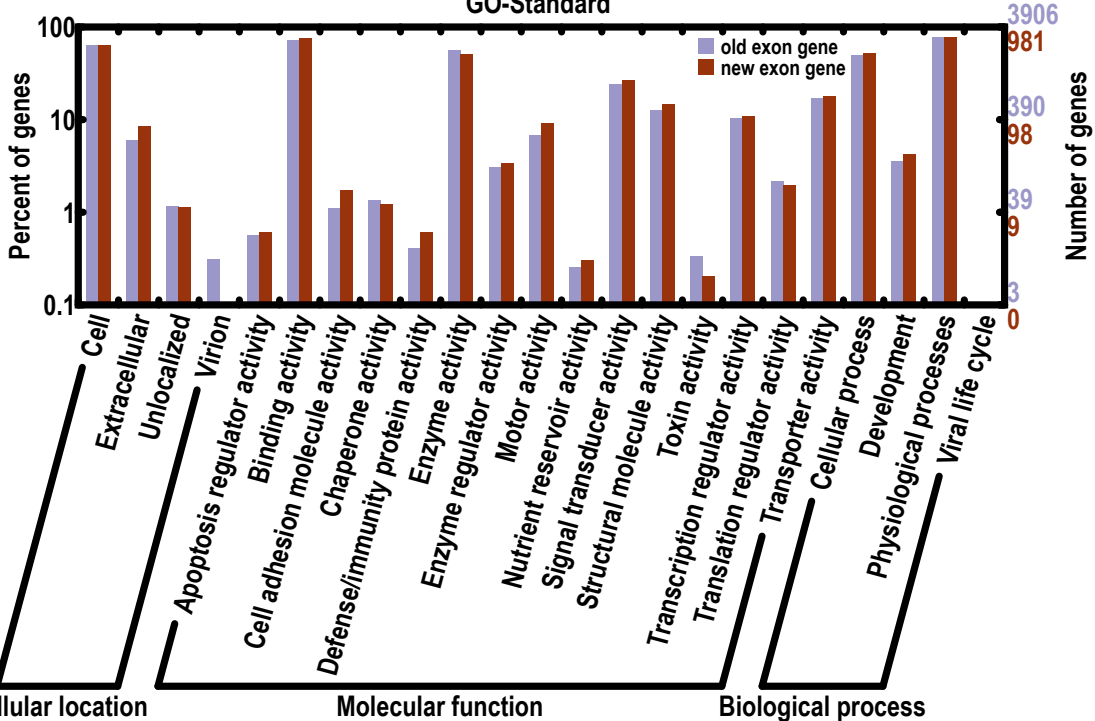

Supplement: genores_gr.3929705_1.pdf [file genores_gr.3929705_1.pdf]

# Mouse to Rat

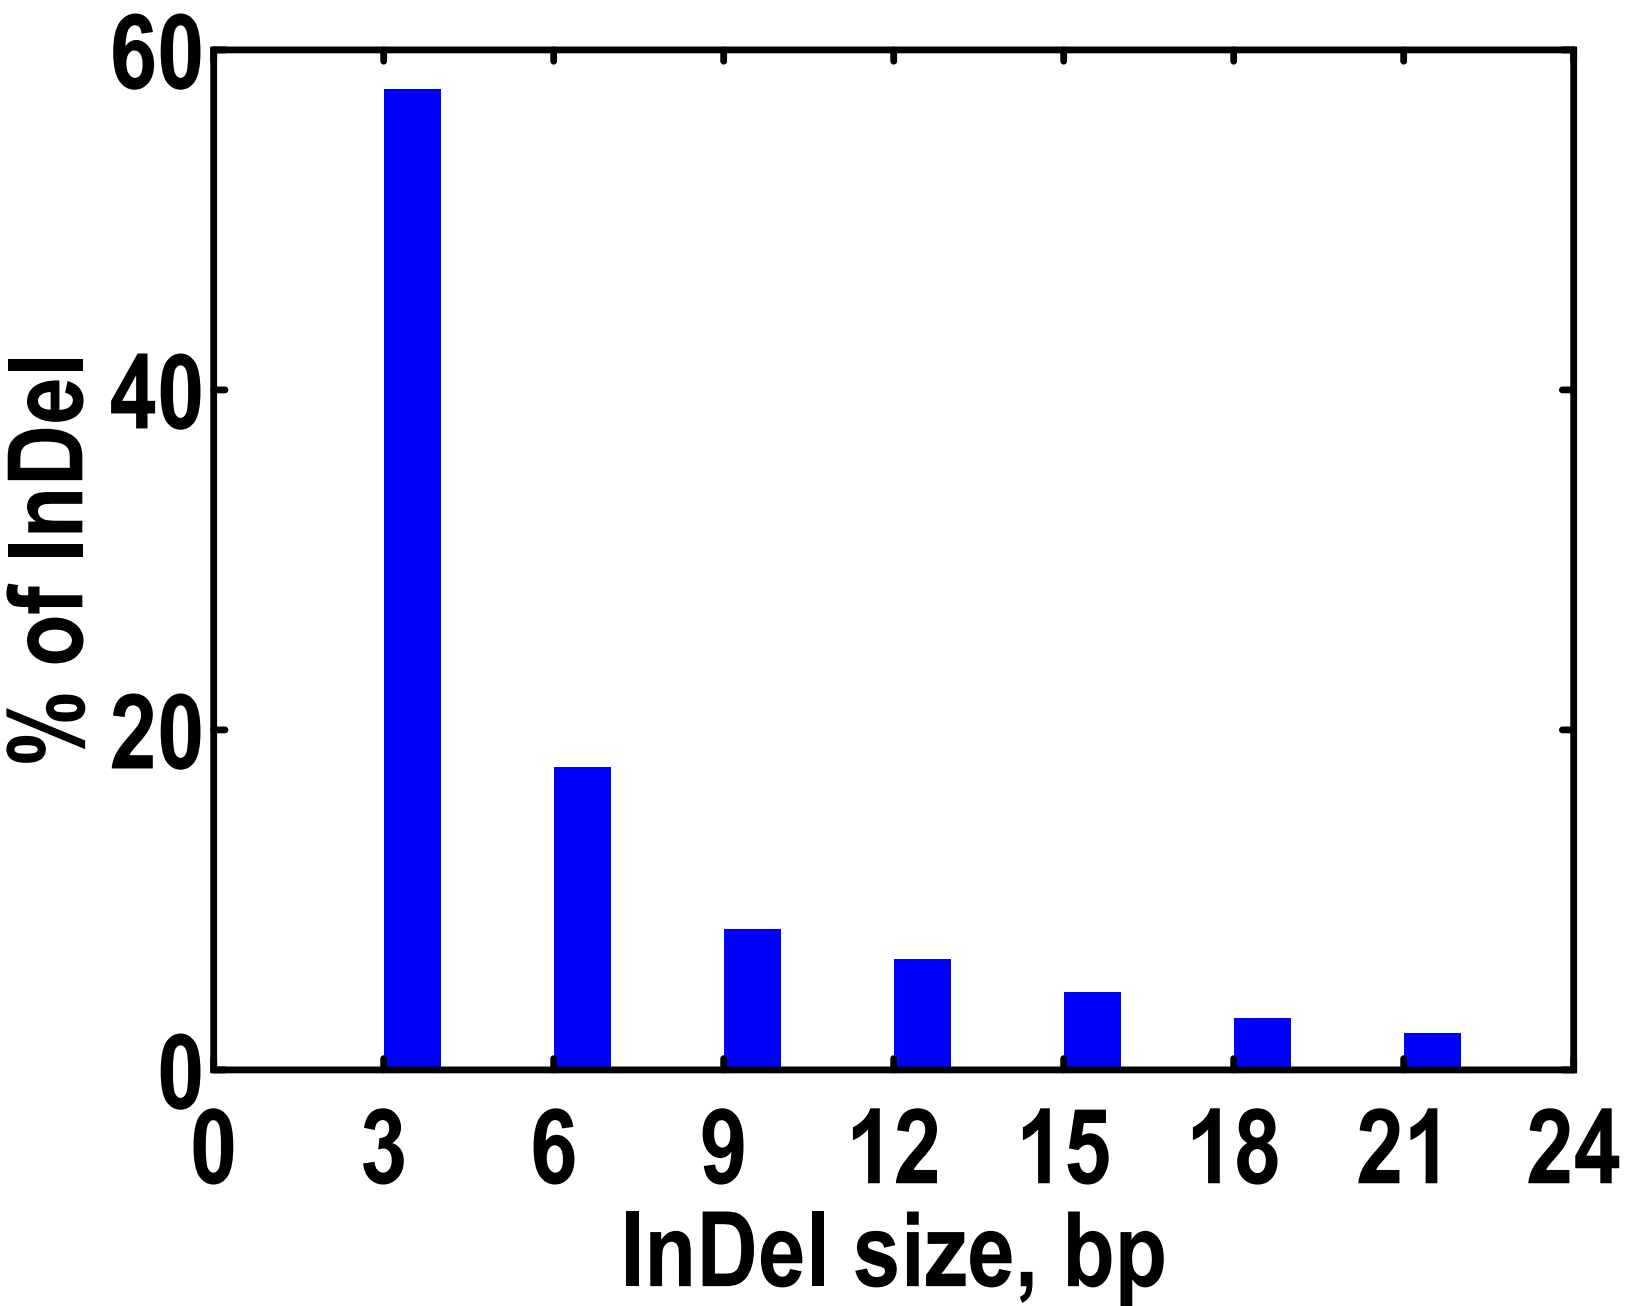

Supplement: genores_gr.3929705_2.pdf [file genores_gr.3929705_2.pdf]
